# Supplementary material
Source: publisher site journal article supplement (https://www.dovepress.com/article/460878)

**Figure legend**

**Figure S1.** Cranial and neck MRI findings. MRI indicated tumor recurrence in left orbital wall (**A**), accompanied by multiple brain (**B** and **C**), meningeal (**D** and **E**), and neck lymph node metastases (**F**).


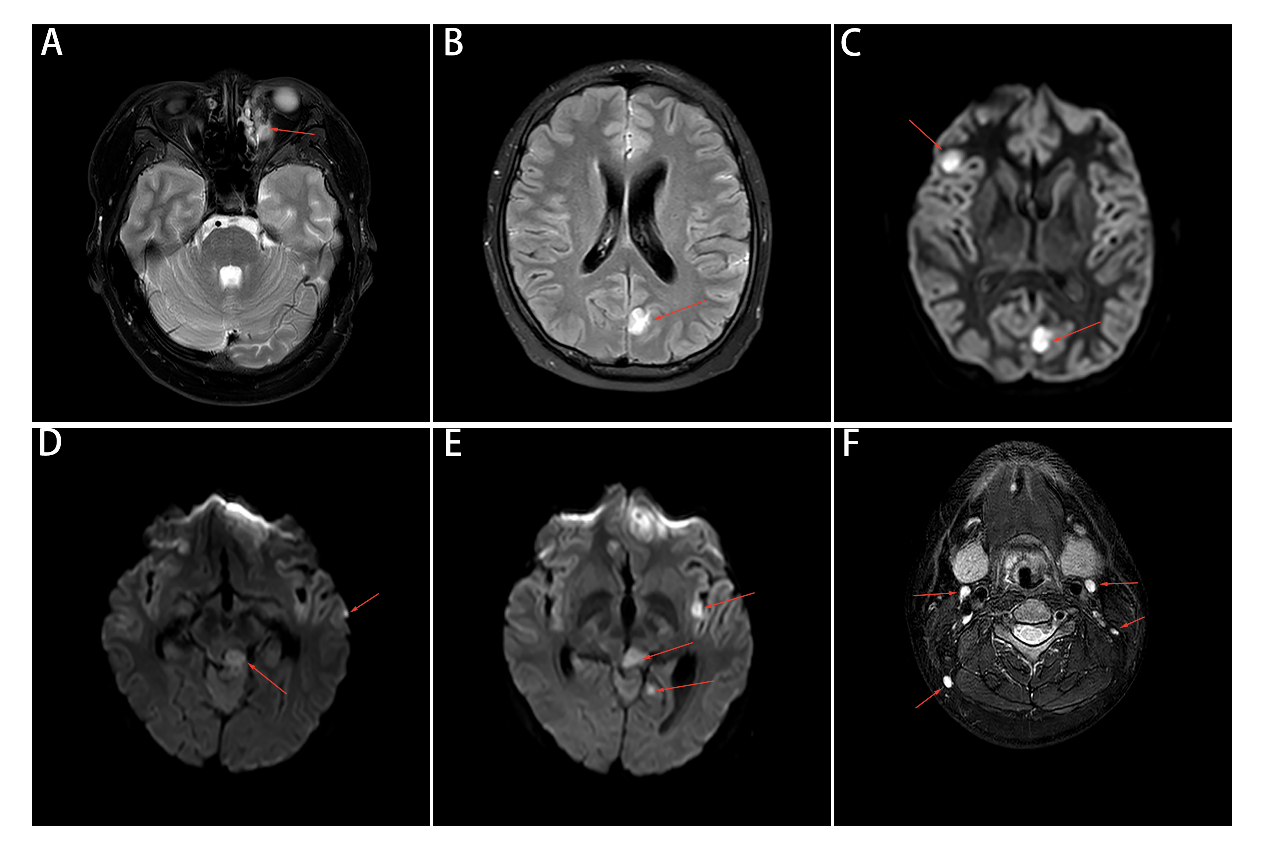

Supplement: Supplementary file 1 [file get_supplementary_file.php]
